# Supplementary material for: Associations of pre-existing cardiovascular morbidity with severity and the fatality rate in COVID-19 patients: a systematic review and meta-analysis
Source: PubMed Central journal article supplement — Osong Public Health Res Perspect. 2022 Feb 18;13(1):37–50. doi: 10.24171/j.phrp.2021.0186 (PMC8907611; doi:10.24171/j.phrp.2021.0186), 2022-02-18
Supplement: j-phrp-2021-0186-suppl.pdf [file j-phrp-2021-0186-suppl.pdf]

**Table S1.** Quality assessment of the studies on cardiovascular disease as a comorbidity in coronavirus disease 2019 patients using the Joanna Briggs Institute's tool

| Study                                                                                                         | Huang et al. [58] | Wang et al. [5] | Goyal et al. [14] | Zhang et al. [15] | Hu et al. [16] | Guo et al. [17] | Zhang et al. [18] | Du et al. [19] | Rosenberg et al. [20] | Lei et al. [21] | Mercuro et al. [22] | Saleh et al. [23] | Inciardi et al. [24] | Bhatia et al. [25] | Sala et al. [26] | Ennamann et al. [27] | Guan et al. [4] | Qin et al. [28] | Huang et al. [29] | Wan et al. [30] | Shi et al. [31] | Zhou et al. [32] | Lagi et al. [34] | Wang et al. [33] | Chen et al. [35] | Yang et al. [37] | Chen et al. [12] | Jin et al. [38] | Richardson et al. [13] | Yan et al. [39] | Guan et al. [40] | Gold et al. [41] | Grasselli et al. [5] | Wang et al. [42] |         |     |
|---------------------------------------------------------------------------------------------------------------|-------------------|-----------------|-------------------|-------------------|----------------|-----------------|-------------------|----------------|-----------------------|-----------------|---------------------|-------------------|----------------------|--------------------|------------------|----------------------|-----------------|-----------------|-------------------|-----------------|-----------------|------------------|------------------|------------------|------------------|------------------|------------------|-----------------|------------------------|-----------------|------------------|------------------|----------------------|------------------|---------|-----|
| Were there clear criteria for inclusion in the case series?                                                   | No                | No              | Yes               | No                | No             | No              | No                | No             | Yes                   | No              | Yes                 | No                | Yes                  | No                 | No               | No                   | No              | No              | No                | No              | No              | No               | No               | No               | No               | No               | No               | No              | No                     | No              | No               | No               | No                   | No               | No      |     |
| Was the condition measured in a standard, reliable way for all participants included in the case series?      | Yes               | Yes             | Yes               | Yes               | Yes            | Yes             | Yes               | Yes            | Unclear               | Yes             | Yes                 | No                | Yes                  | Yes                | Unclear          | Yes                  | Yes             | Yes             | Yes               | Yes             | Yes             | Yes              | Yes              | Yes              | Yes              | Yes              | Yes              | Yes             | Yes                    | Yes             | Yes              | Unclear          | Yes                  | Yes              |         |     |
| Were valid methods used for identification of the condition for all participants included in the case series? | Yes               | Yes             | Yes               | Not clear         | Yes            | Yes             | Yes               | Yes            | Unclear               | Yes             | No                  | Yes               | Yes                  | Yes                | Unclear          | Yes                  | Yes             | Yes             | Yes               | Yes             | Yes             | Yes              | No               | Yes              | Yes              | Yes              | Yes              | Yes             | Yes                    | Yes             | Yes              | Unclear          | Yes                  | Yes              |         |     |
| Did the case series have a clear definition of participants?                                                  | No                | Yes             | Yes               | Yes               | Yes            | Yes             | Yes               | Yes            | No                    | No              | Unclear             | Unclear           | Yes                  | Yes                | No               | Unclear              | Unclear         | Unclear         | Unclear           | Unclear         | Unclear         | Yes              | Yes              | No               | Unclear          | Yes              | Yes              | Yes             | No                     | Unclear         | No               | Unclear          | No                   | Yes              | No      |     |
| Did the case series have a clear definition of participants?                                                  | Unclear           | Unclear         | Yes               | Unclear           | Unclear        | No              | Unclear           | Unclear        | Unclear               | Unclear         | Unclear             | Unclear           | Yes                  | Unclear            | Unclear          | No                   | Unclear         | Unclear         | Unclear           | Unclear         | Unclear         | No               | Unclear          | Yes              | Unclear          | Unclear          | Yes              | Unclear         | Unclear                | No              | Unclear          | Unclear          | No                   | Unclear          | Unclear |     |
| Was there clear reporting of the outcomes of the participants in the study?                                   | Yes               | Yes             | Yes               | Yes               | Yes            | Yes             | Yes               | Yes            | Yes                   | Yes             | Yes                 | Yes               | Yes                  | Yes                | Yes              | Yes                  | Yes             | Yes             | Yes               | Yes             | Yes             | Yes              | Yes              | Yes              | Yes              | Yes              | Yes              | Yes             | Yes                    | Yes             | Yes              | Yes              | Yes                  | Yes              | Yes     | Yes |
| Was there clear reporting of clinical information of the participants?                                        | Yes               | Yes             | Yes               | Yes               | Yes            | Yes             | Yes               | Yes            | Yes                   | Yes             | Yes                 | Yes               | Yes                  | Yes                | Yes              | Yes                  | Yes             | Yes             | Yes               | Yes             | Yes             | Yes              | Yes              | Yes              | Yes              | Yes              | Yes              | Yes             | Yes                    | Yes             | Yes              | Yes              | Yes                  | Yes              | Yes     | Yes |
| Were the outcomes or follow up results of cases clearly reported?                                             | Yes               | Yes             | Yes               | Yes               | Yes            | Yes             | Yes               | Yes            | Yes                   | Yes             | Yes                 | Yes               | Yes                  | Yes                | Yes              | Yes                  | Yes             | Yes             | Yes               | Yes             | Yes             | Yes              | Yes              | Yes              | Yes              | Yes              | Yes              | Yes             | Yes                    | Yes             | Yes              | Yes              | Yes                  | Yes              | Yes     | Yes |
| Was there clear reporting of the presenting site(s), clinical(s) demographic information?                     | Yes               | Yes             | Yes               | Yes               | Yes            | Yes             | Yes               | Yes            | Yes                   | No              | Yes                 | No                | No                   | Yes                | No               | No                   | Yes             | Yes             | Yes               | Yes             | Yes             | Yes              | Yes              | Yes              | Yes              | Yes              | Yes              | No              | No                     | Yes             | No               | No               | No                   | No               | No      |     |
| Was statistical analysis appropriate?                                                                         | Yes               | Yes             | Unclear           | Yes               | Yes            | Yes             | Yes               | Yes            | Yes                   | Yes             | Yes                 | Yes               | Yes                  | Yes                | Unclear          | Yes                  | Yes             | Yes             | Yes               | Yes             | Yes             | Yes              | Yes              | Yes              | Yes              | Yes              | Yes              | Yes             | Yes                    | Yes             | Yes              | Yes              | Yes                  | Yes              | Yes     | Yes |
